# Supplementary material
Source: publisher figshare collection journal article supplement (https://acs.figshare.com/ndownloader/files/9608248)
Supplement: Supplementary file 1 [file 9608248]

49
00000001
Pd      1.181000   -0.910000   -0.576000
Cl      3.184000   -1.386000   -1.879000
Cl     -0.045000   -2.407000   -1.890000
C       1.192000    1.546000    0.475000
C       1.580000    3.004000    0.297000
C       0.368000    3.942000    0.291000
H       2.094000    3.070000   -0.690000
H       2.330000    3.321000    1.048000
C      -0.710000    3.430000   -0.669000
H       0.696000    4.968000    0.011000
H      -0.060000    4.002000    1.317000
H      -1.608000    4.080000   -0.697000
H      -0.313000    3.429000   -1.713000
C      -0.203000    1.175000    0.290000
C      -0.591000   -0.167000    0.696000
C      -1.154000    2.042000   -0.274000
C      -1.947000   -0.588000    0.655000
H       0.036000   -0.621000    1.469000
C      -2.504000    1.602000   -0.480000
C      -2.946000    0.287000    0.091000
N       2.034000    0.529000    0.664000
C       3.413000    0.619000    1.186000
C       3.417000    1.360000    2.543000
H       3.166000    2.435000    2.458000
H       2.684000    0.891000    3.231000
H       4.424000    1.289000    3.004000
C       3.875000   -0.826000    1.461000
H       3.892000   -1.403000    0.516000
H       4.890000   -0.824000    1.914000
H       3.170000   -1.322000    2.159000
C       4.391000    1.272000    0.186000
H       5.435000    1.186000    0.559000
H       4.314000    0.741000   -0.784000
H       4.175000    2.347000    0.032000
S      -4.645000   -0.034000    0.113000
S      -3.593000    2.615000   -1.344000
C      -2.281000   -1.947000    1.336000
C      -3.169000   -1.702000    2.582000
H      -4.098000   -1.174000    2.287000
H      -3.433000   -2.673000    3.059000
H      -2.623000   -1.087000    3.331000
C      -2.996000   -2.894000    0.340000
H      -2.327000   -3.101000   -0.519000
H      -3.241000   -3.854000    0.850000
H      -3.930000   -2.425000   -0.024000
C      -1.017000   -2.697000    1.818000
H      -0.307000   -2.879000    0.986000
H      -0.480000   -2.155000    2.626000
H      -1.326000   -3.678000    2.236000
